# Supplementary material for: Efficient detection of differentially methylated regions in the genome of patients with thoracic aortic dissection and association with MMP2 hypermethylation
Source: PubMed Central journal article supplement — Exp Ther Med. 2020 May 15;20(2):1073–81. doi: 10.3892/etm.2020.8753 (PMC7388572; doi:10.3892/etm.2020.8753), 2020-05-15

Figure S1. Workflow of the identification of differentially methylated regions using array analyses of 4 cases of thoracic aortic dissection and 4 healthy controls. FDR, false discovery rate; chr, chromosome; SNP, single nucleotide polymorphism.

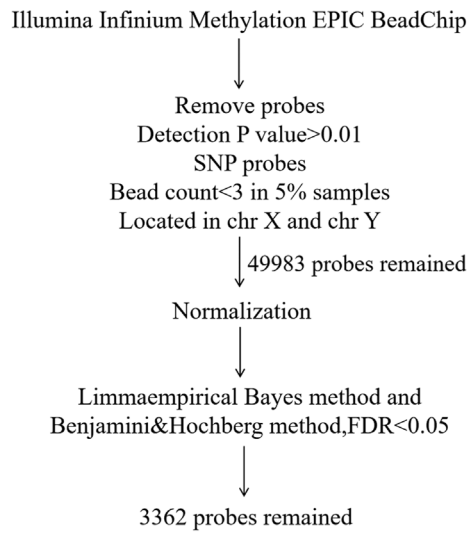

Supplement: Supplementary_Data.pdf [file Supplementary_Data.pdf]
